# Supplementary material for: LSCF–WO3 semiconductor composite electrolytes for low-temperature solid oxide fuel cells
Source: Royal Society of Chemistry journal article supplement (doi:10.1039/d2ra05665h), 2022-01-01
Supplement: d2ra05665h1.pdf [file d2ra05665h1.pdf]

Electronic supplementary information for

LSCF-WO<sub>3</sub> semiconductor composite electrolyte for low temperature solid oxide fuel  
cell

Xiaoqian Jin <sup>a</sup>, Cui Gao <sup>a</sup>, Zhi Liu <sup>a</sup>, Wenjing Dong <sup>a,b</sup>, Chen Xia <sup>a,\*</sup>, Baoyuan Wang <sup>a,b</sup>, Hao Wang <sup>a,b</sup>,  
Xunying Wang <sup>a,b,\*</sup>

<sup>a</sup> *School of Microelectronics and Faculty of Physics and Electronic Science, Hubei University, Wuhan 430062,  
China*

<sup>b</sup> *Hubei Yangtze Memory Laboratories, Wuhan 430205, China*

\* *Corresponding Author: [wangxunying@hubu.edu.cn](mailto:wangxunying@hubu.edu.cn) (X. Wang), [chenxia@hubu.edu.cn](mailto:chenxia@hubu.edu.cn) (C. Xia)*

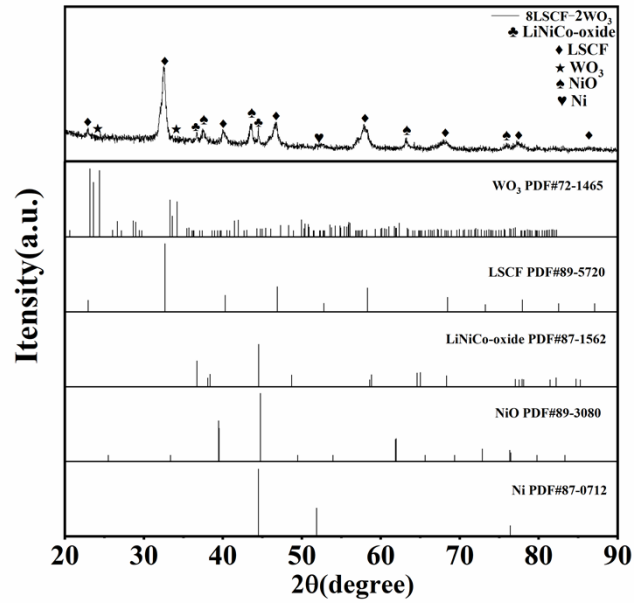

Fig.S1. XRD pattern of the 8LSCF-2WO<sub>3</sub> electrolyte in the tested solid oxide fuel cell

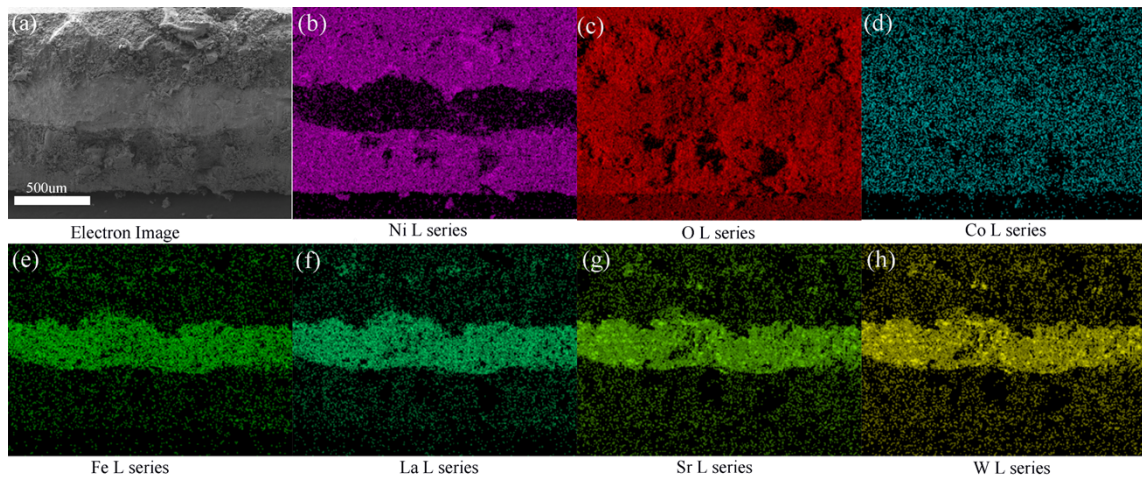

Fig.S2. The cross-sectional elemental mappings of the fuel cell: (a) SEM image, (b) Ni, (c)O, (d) Co, (e) Fe, (f)La,

(g) Sr,(h) W.

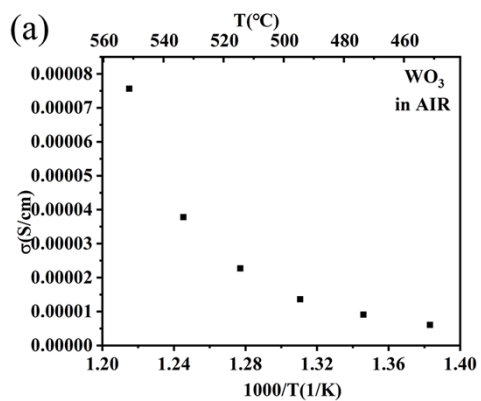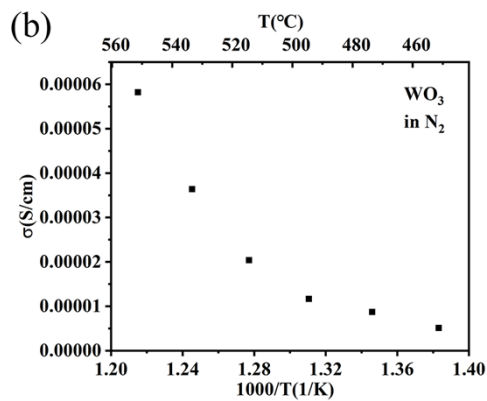

Figure S3 Conductivity of WO<sub>3</sub> in (a) Air and (b) N<sub>2</sub> atmosphere.

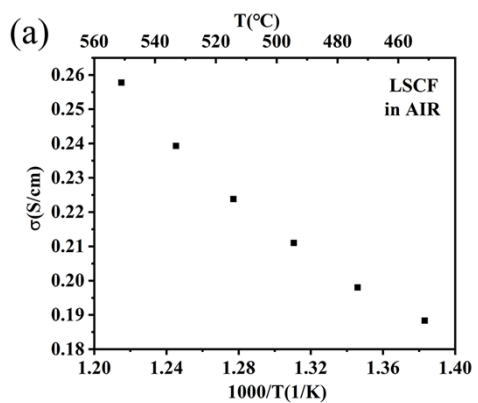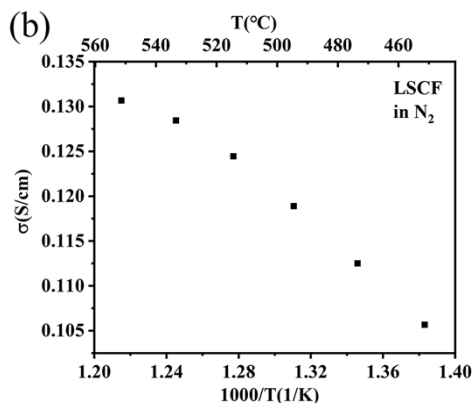

Figure S4 Conductivity of LSCF in (a) Air and (b) N<sub>2</sub> atmosphere.
